# Supplementary material for: Soft Coral-Derived Dihydrosinularin Exhibits Antiproliferative Effects Associated with Apoptosis and DNA Damage in Oral Cancer Cells
Source: MDPI journal article supplement (doi:10.3390/ph14100994), 2021-09-29
Supplement: s1 [file s1]

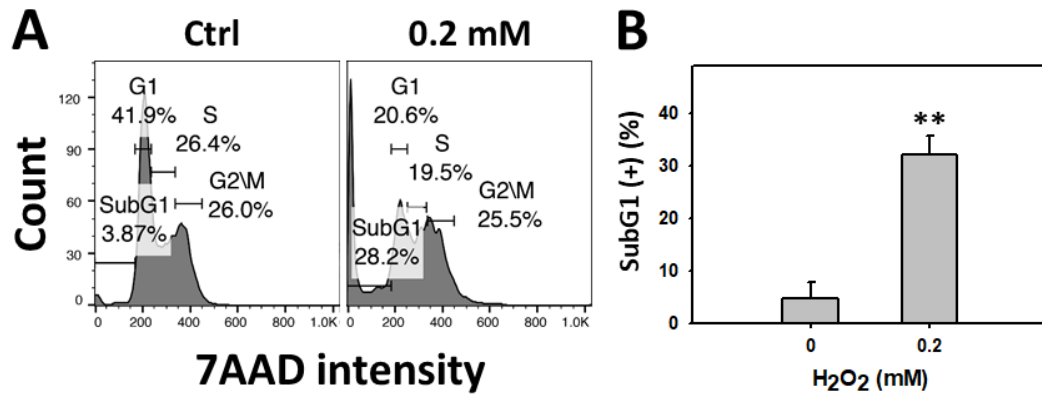

**Figure S1-AB.** Positive control patterns for subG1 accumulation. (A) Flow cytometry pattern. (B) Statistics. Cells (Ca9-22) were treated with H<sub>2</sub>O<sub>2</sub> (200  $\mu$ M) for 24 h. \*\* indicates  $P < 0.01$  ( $t$ -test). Data = mean  $\pm$  SD ( $n = 3$ ).

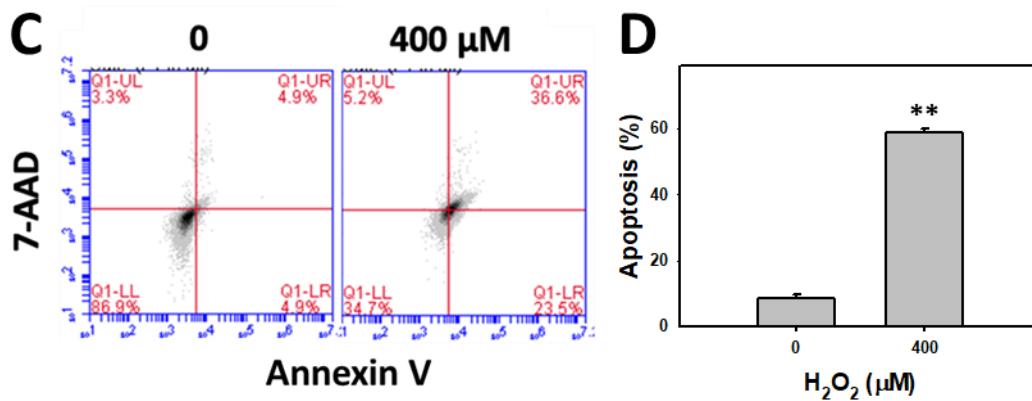

**Figure S1-CD.** Positive control patterns for apoptosis. (C) Flow cytometry pattern. (D) Statistics. Cells (Ca9-22) were treated with H<sub>2</sub>O<sub>2</sub> (400  $\mu$ M) for 24 h. \*\* indicates  $P < 0.01$  ( $t$ -test). Data = mean  $\pm$  SD ( $n = 3$ ).

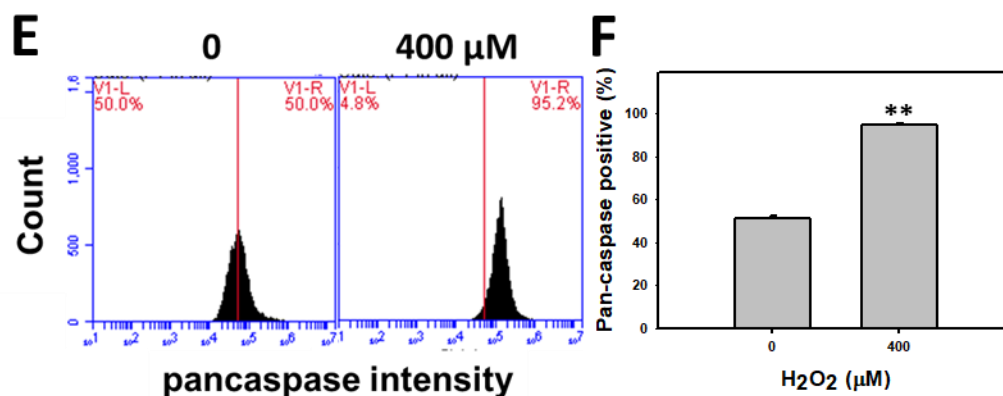

**Figure S1-EF.** Positive control patterns for pancaspase. (E) Flow cytometry pattern. (F) Statistics. Cells (CAL 27) were treated with H<sub>2</sub>O<sub>2</sub> (400  $\mu$ M) for 24 h. \* and \*\* indicate  $P < 0.05$  and  $P < 0.01$  ( $t$ -test). Data = mean  $\pm$  SD ( $n = 3$ ).

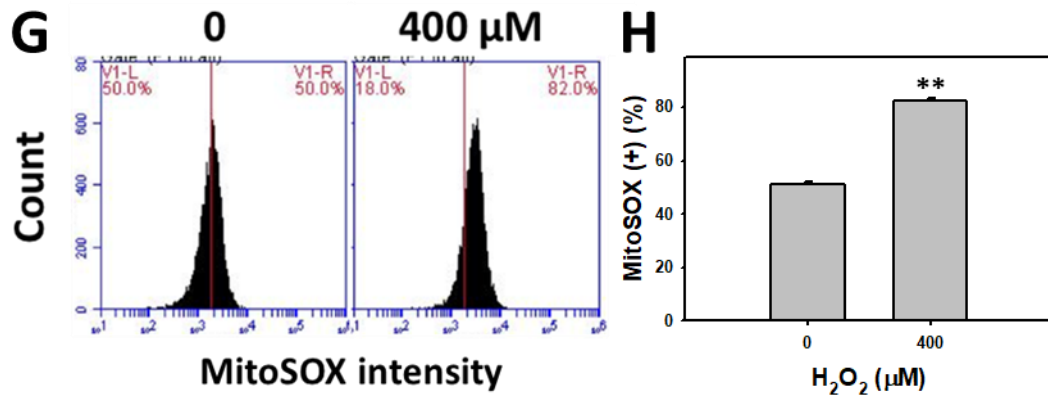

**Figure S1-GH.** Positive control patterns for MitoSOX analysis. (G) Flow cytometry pattern. (H) Statistics. Cells (Ca9-22) were treated with H<sub>2</sub>O<sub>2</sub> (400  $\mu\text{M}$ ) for 24 h. \*\* indicates  $P < 0.01$  ( $t$ -test). Data = mean  $\pm$  SD ( $n = 3$ ).

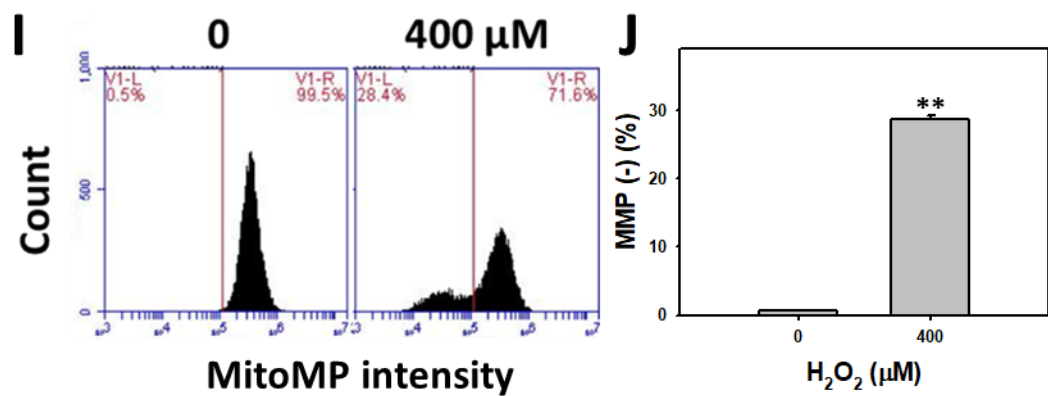

**Figure S1-IJ.** Positive control patterns for MitoMP analysis. (I) Flow cytometry pattern. (J) Statistics. Cells (Ca9-22) were treated with H<sub>2</sub>O<sub>2</sub> (400  $\mu\text{M}$ ) for 24 h. \*\* indicates  $P < 0.01$  ( $t$ -test). Data = mean  $\pm$  SD ( $n = 3$ ).

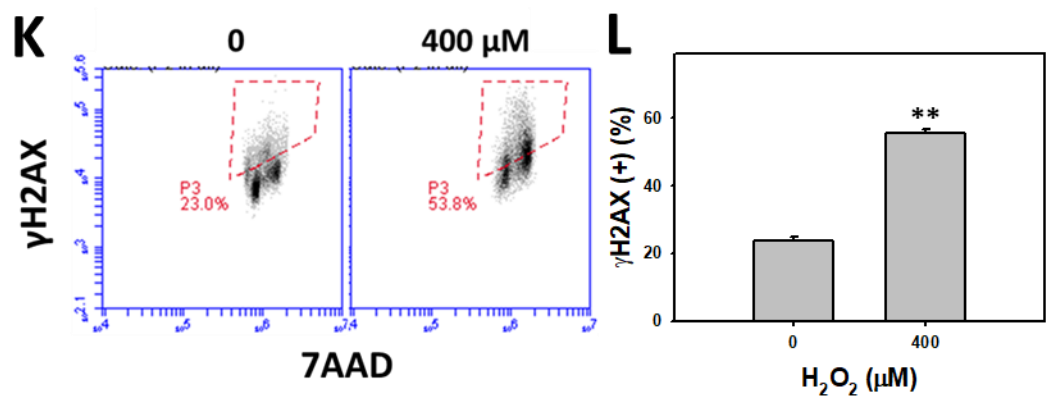

**Figure S1-KL.** Positive control patterns for  $\gamma\text{H2AX}$  analysis. (K) Flow cytometry pattern. (L) Statistics. Cells (Ca9-22) were treated with H<sub>2</sub>O<sub>2</sub> (400  $\mu\text{M}$ ) for 24 h. \*\* indicates  $P < 0.01$  ( $t$ -test). Data = mean  $\pm$  SD ( $n = 3$ ).
